# Supplementary material
Source: PubMed Central journal article supplement (PMC7643760)
Supplement: supp_tables1.pdf [file supp_tables1.pdf]

## Supplementary Data

SUPPLEMENTARY TABLE S1. NONCURATIVE PROCEDURES WITH POTENTIALLY PALLIATIVE INDICATIONS  
FOR PATIENTS WITH PANCREATIC CANCER

| <i>Procedure</i>                                                                                           | <i>Procedure codes</i>                                                                                                                                                                                                                                                                                                                                                                                                                                                                                                                |
|------------------------------------------------------------------------------------------------------------|---------------------------------------------------------------------------------------------------------------------------------------------------------------------------------------------------------------------------------------------------------------------------------------------------------------------------------------------------------------------------------------------------------------------------------------------------------------------------------------------------------------------------------------|
| Ascites                                                                                                    |                                                                                                                                                                                                                                                                                                                                                                                                                                                                                                                                       |
| Intraperitoneal drain placement                                                                            | ICD-9-CM 54.93; CPT 49324, 49418, 49419, 49421; ICD-10-CM 0D9W00Z, 0D9W30Z, 0D9W40Z, 0W1G3J4, 0W1G0J4, 0W1G4J4                                                                                                                                                                                                                                                                                                                                                                                                                        |
| Paracentesis                                                                                               | ICD-9-CM 54.91; CPT 49082, 49083; ICD-10-CM 0D9W0ZX, 0D9W0ZZ, 0D9W3ZX, 0D9W3ZZ, 0D9W4ZX, 0D9W4ZZ, 0W9G0ZX, 0W9G0ZZ, 0W9G3ZZ, 0W9G4ZX, 0W9G4ZZ, 0W9G00Z, 0W9G30Z, 0W9G40Z                                                                                                                                                                                                                                                                                                                                                              |
| Peritoneovascular shunt                                                                                    | ICD-9-CM 54.94; CPT 49425; ICD-10-CM 0W1G0JY, 0W1G4JY                                                                                                                                                                                                                                                                                                                                                                                                                                                                                 |
| Biliary obstruction                                                                                        |                                                                                                                                                                                                                                                                                                                                                                                                                                                                                                                                       |
| Bile duct incision, excision, exploration, drainage, dilation, stent, or resection or gallbladder drainage | ICD-9-CM 51.01, 51.02, 51.03, 51.04, 51.42, 51.43, 51.49, 51.51, 51.59, 51.6, 51.62, 51.63, 51.72, 51.79, 51.86, 51.87, 51.94, 51.98, 51.99; CPT 47400, 47420, 47425, 47460, 47480, 47490, 47510, 47511, 47533, 47534, 47537, 47538, 47539, 47540, 47542, 47800, 47801; ICD-10-CM 0F75*, 0F76*, 0F78*, 0F79*, 0F7C*, 0F7D*, 0F7F*, 0F99*, 0F9C*, 0F9D*, 0FB4*, 0FB5*, 0FB6*, 0FB8*, 0FB9*, 0FBC*, 0FBD*, 0FBF*, 0FBG*, 0FT4*, 0FT5*, 0FT6*, 0FT7*, 0FT8*, 0FTC*, 0FTD*                                                                |
| Biliary bypass                                                                                             | ICD-9-CM 51.31 51.32 51.33 51.34 51.35, 51.36, 51.37, 51.39; CPT 47570, 47720, 47721, 47740, 47741, 47760, 47765, 47780, 47785; ICD-10-CM 0F14*, 0F15*, 0F16*, 0F18*, 0F19*, 0F1D*, 0F1G*                                                                                                                                                                                                                                                                                                                                             |
| Gastric outlet obstruction or malignant bowel obstruction <sup>a</sup>                                     |                                                                                                                                                                                                                                                                                                                                                                                                                                                                                                                                       |
| Bypass procedures (gastro-enterostomy; entero-enterostomy)                                                 | ICD-9-CM 43.6, 43.7, 43.8, 43.71, 43.89, 44.38, 44.39, 45.91, 45.93, 45.94, 46.93, 46.94; CPT 43810, 43820, 43825, 43860, 44130; ICD-10-CM (excluding to cutaneous) 0D16*, 0D19*, 0D1A*, 0D1B*, 0D1H*, 0D1K*, 0D1L*, 0D1M*, 0D1N*                                                                                                                                                                                                                                                                                                     |
| Stent, decompression, or drainage                                                                          | ICD-9-CM 46.86; CPT 43266, 44021, 44370, 45327, 45337, 45347, 45389, 45393; ICD-10-CM 0D96*, 0D97*, 0D98*, 0D99*, 0D9A*, 0D9B*, 0D9C*, 0D9E*, 0D9F*, 0D9G*, 0D9H*, 0D9J*, 0D9K*, 0D9L*, 0D9M*, 0D9N*, 0D9P*                                                                                                                                                                                                                                                                                                                           |
| Gastric or intestinal resection or excision                                                                | ICD-9-CM 43.89, 45.61, 45.62, 45.73, 45.74, 45.76; CPT 43631, 43632, 43633, 44111, 44120, 44121, 44140, 44141, 44143, 44144, 44145, 44146, 44147, 44150, 44151, 44155, 44156, 44157, 44158, 44160, 44202, 44203, 44204, 44206, 44207, 44208, 44210, 44211, 44212, ICD-10-CM 0DB6*, 0DB7*, 0DB8*, 0DB9*, 0DBA*, 0DBB*, 0DBB*, 0DBC*, 0DBE*, 0DBF*, 0DBG*, 0DBH*, 0DBJ*, 0DBK*, 0DBL*, 0DBM*, 0DBN*, 0DBP*, 0DT6*, 0DT7*, 0DT8*, 0DT9*, 0DTA*, 0DTB*, 0DT*, 0DTC*, 0DTE*, 0DTF*, 0DTG*, 0DTH*, 0DTJ*, 0DTK*, 0DTL*, 0DTM*, 0DTN*, 0DTP* |
| Ostomy                                                                                                     | ICD-9-CM 46.1, 46.11, 46.2, 46.21, 46.39; CPT 44125, 44125, 44186, 44187, 44188, ICD-10-CM (to cutaneous, any approach) 0D16*, 0D19*, 0D1A*, 0D1B*, 0D1H*, 0D1K*, 0D1L*, 0D1M*, 0D1N*                                                                                                                                                                                                                                                                                                                                                 |
| Venting gastrostomy, jejunostomy, ileostomy, or colostomy tube placement                                   | ICD-9-CM 43.11, 43.19, 44.32; CPT 43653, 43750, 43820, 43830, 43832, 44015, 44300, 44320, 44373, 49440, 49446, 44615; 0DH60UZ, 0DH63UZ, 0DH64UZ, 0DH67UZ, 0DH68UZ, 0DH80UZ, 0DH83UZ, 0DH84UZ, 0DH87UZ, 0DH88UZ, 0DH90UZ, 0DH93UZ, 0DH94UZ, 0DH97UZ, 0DH98UZ, 0DHA0UZ, 0DHA3UZ, 0DHA4UZ, 0DHA7UZ, 0DHA8UZ, 0DHB0UZ, 0DHB3UZ, 0DHB4UZ, 0DHB7UZ, 0DHB8UZ                                                                                                                                                                                 |
| Lysis of adhesions                                                                                         | ICD-9-CM 54.51, 54.59; CPT 44005, 44180, ICD-10-CM 0DN8*, 0DN9*, 0DNA*, 0DNB*, 0DNC*, 0DNE*, 0DNF*, 0DNG*, 0DNH*, 0DNK*, 0DNL*, 0DNM*, 0DNN*, 0DNP*                                                                                                                                                                                                                                                                                                                                                                                   |
| Failure to thrive <sup>b</sup>                                                                             |                                                                                                                                                                                                                                                                                                                                                                                                                                                                                                                                       |
| Gastrostomy or jejunostomy tube placement (for feeding)                                                    | ICD-9-CM 43.11, 43.19, 44.32; CPT 43653, 43750, 43820, 43830, 43832, 44015, 44300, 44373, 49440, 49446; ICD-10-CM 0DH60UZ, 0DH63UZ, 0DH64UZ, 0DH67UZ, 0DH68UZ, 0DH80UZ, 0DH83UZ, 0DH84UZ, 0DH87UZ, 0DH88UZ, 0DH90UZ, 0DH93UZ, 0DH94UZ, 0DH97UZ, 0DH98UZ, 0DHA0UZ, 0DHA3UZ, 0DHA4UZ, 0DHA7UZ, 0DHA8UZ, 0DHB0UZ, 0DHB3UZ, 0DHB4UZ, 0DHB7UZ, 0DHB8UZ                                                                                                                                                                                     |
| Malignant pleural effusion                                                                                 |                                                                                                                                                                                                                                                                                                                                                                                                                                                                                                                                       |
| Thoracentesis                                                                                              | ICD-9-CM 34.91; CPT 32421, 32554, 32555; ICD-10-CM 0B9N00Z, 0B9N00Z                                                                                                                                                                                                                                                                                                                                                                                                                                                                   |
| Drain placement                                                                                            | ICD-9-CM 34.0, 34.02, 34.04, 34.05; CPT 32020, 32422, 32550, 32551, 32556, 32557; ICD-10-CM 0B9P00Z, 0B9N00Z, 0B9P30Z, 0B9N30Z, 0B9N40Z, 0B9P40Z                                                                                                                                                                                                                                                                                                                                                                                      |
| Pleurodesis                                                                                                | ICD-9-CM 34.91, 34.92; CPT 32560, 32650; ICD-10-CM 3E0L3TZ                                                                                                                                                                                                                                                                                                                                                                                                                                                                            |
| Surgical drainage or decortication                                                                         | ICD-9-CM 34.06, 34.09, 34.51, 34.52, 34.6; CPT 32320, 32225; 32664, 32651, 32652, 32656, ICD-10-CM 0B9N0ZZ, 0B9P0ZZ, 0B9P4ZZ, 0B9N4ZZ, 0B9P30ZZ, 0B5N0ZZ, 0B5N3ZZ, 0B5N4ZZ, 0B5P0ZZ, 0B5P3ZZ, 0B5P4ZZ, 0BDN0ZZ, 0BDN3ZZ, 0BDN4ZZ, 0BDP0ZZ, 0BDP3ZZ, 0BDP4ZZ                                                                                                                                                                                                                                                                           |

(continued)

SUPPLEMENTARY TABLE S1. (CONTINUED)

| <i>Procedure</i>                                         | <i>Procedure codes</i>                                                                                                                                                                                                                                                                                                                                                                                                |
|----------------------------------------------------------|-----------------------------------------------------------------------------------------------------------------------------------------------------------------------------------------------------------------------------------------------------------------------------------------------------------------------------------------------------------------------------------------------------------------------|
| Pain                                                     |                                                                                                                                                                                                                                                                                                                                                                                                                       |
| Destruction or excision of sympathetic nerve or ganglion | ICD-9-CM 05.0, 05.2, 05.29 05.32, 05.39, 05.89; CPT 32664, 64530, 64680; ICD-10-CM 01BL0ZZ, 01BL3ZZ, 01BL4ZZ, 01B80ZZ, 01B83ZZ, 01B84ZZ, 01BM0ZZ, 01BM3ZZ, 01BM4ZZ, 01880ZZ, 01883ZZ, 01884ZZ, 018L0ZZ, 018L3ZZ, 018L4ZZ, 018M0ZZ, 018M3ZZ, 018M4ZZ, 01580ZZ, 01583ZZ, 01584ZZ, 015L0ZZ, 015L3ZZ, 015L4ZZ, 015M0ZZ, 015M3ZZ, 015M4ZZ, 01D80ZZ, 01D83ZZ, 01D84ZZ, 01DL0ZZ, 01DL3ZZ, 01DL4ZZ, 01DM0ZZ, 01DM3ZZ, 01DM4ZZ |

<sup>a</sup>If patient has diagnosis code indicating obstruction: 537.0, 537.3, 560.8, 560.81, 560.89, 560.9, K56, K56.0, K56.5, K56.6, K56.60, K56.69, K56.7.

<sup>b</sup>If patient does not have diagnosis code indicating obstruction.
